# Supplementary material
Source: PubMed Central journal article supplement (PMC4103746)
Supplement: NIHMS602046-supplement-supplementary_tables.pdf [file NIHMS602046-supplement-supplementary_tables.pdf]

**Supplementary Table I. AcP-dependent responses in reconstituted cortical neurons**

| ProbeSet_ID  | GeneName | Description                                | Accession# | Category  | AcP FC | error% | AcP+AcPb FC | error% |
|--------------|----------|--------------------------------------------|------------|-----------|--------|--------|-------------|--------|
| 1419209_at   | Cxcl1    | chemokine                                  | NM_008176  | chemokine | 100.0  | 2%     | 74.6        | 13%    |
| 1418930_at   | Cxcl10   | chemokine                                  | NM_021274  | chemokine | 89.0   | 6%     | 67.3        | 10%    |
| 1457644_s_at | Cxcl1    | chemokine                                  | NM_008176  | chemokine | 24.6   | 7%     | 17.2        | 7%     |
| 1420380_at   | Ccl2     | chemokine                                  | NM_011333  | chemokine | 14.1   | 19%    | 13.6        | 14%    |
| 1449984_at   | Cxcl2    | chemokine                                  | NM_009140  | chemokine | 13.6   | 21%    | 12.7        | 29%    |
| 1419728_at   | Cxcl5    | chemokine                                  | NM_009141  | chemokine | 10.0   | 27%    | 8.8         | 22%    |
| 1421228_at   | Ccl7     | chemokine                                  | NM_013654  | chemokine | 7.5    | 43%    | 3.2         | 33%    |
| 1418240_at   | Gbp2     | G-binding protein                          | NM_010260  | signaling | 36.8   | 13%    | 38.5        | 22%    |
| 1435906_x_at | Gbp2     | G-binding protein                          | NM_010260  | signaling | 36.8   | 16%    | 26.2        | 26%    |
| 1417483_at   | Nfkbiz   | NFkB inhibitor, zeta                       | NM_030612  | signaling | 11.8   | 6%     | 7.7         | 10%    |
| 1448728_a_at | Nfkbiz   | NFkB inhibitor, zeta                       | NM_030612  | signaling | 8.3    | 17%    | 5.9         | 29%    |
| 1419647_a_at | Ier3     | anti-apoptotic target of NFkB              | NM_133662  | signaling | 6.6    | 10%    | 3.6         | 9%     |
| 1418392_a_at | Gbp3     | G-binding protein                          | NM_018734  | signaling | 4.5    | 13%    | 2.7         | 12%    |
| 1449773_s_at | Gadd45b  | anti-apoptotic target of NFkB              | NM_008655  | signaling | 3.9    | 7%     | 2.9         | 9%     |
| 1425156_at   | Gbp6     | G-binding protein                          | NM_145545  | signaling | 3.6    | 16%    | 3.3         | 19%    |
| 1450173_at   | Ripk2    | TNFRSF-interacting serine-threonine kinase | NM_138952  | signaling | 3.5    | 7%     | 2.9         | 6%     |
| 1450971_at   | Gadd45b  | anti-apoptotic target of NFkB              | NM_008655  | signaling | 3.4    | 14%    | 3.2         | 16%    |
| 1434380_at   | Gbp6     | G-binding protein                          | NM_145545  | signaling | 3.4    | 9%     | 3.0         | 13%    |
| 1455899_x_at | Socs3    | suppressor of cytokine signaling           | NM_007707  | signaling | 3.2    | 10%    | 2.2         | 12%    |
| 1456212_x_at | Socs3    | suppressor of cytokine signaling           | NM_007707  | signaling | 3.2    | 24%    | 2.3         | 17%    |
| 1458299_s_at | Nfkbie   | NFkB inhibitor, epsilon                    | NM_008690  | signaling | 3.0    | 9%     | 3.5         | 17%    |

|              |           |                                              |              |                      |      |     |     |     |
|--------------|-----------|----------------------------------------------|--------------|----------------------|------|-----|-----|-----|
| 1449731_s_at | Nfkbia    | NFkB inhibitor, alpha                        | NM_010907    | signaling            | 2.8  | 4%  | 2.0 | 4%  |
| 1418825_at   | Irgm      | immunity-related GTPase family, M            | NM_008326    | signaling            | 2.7  | 10% | 1.8 | 7%  |
| 1431843_a_at | Nfkbie    | NFkB inhibitor, epsilon                      | NM_008690    | signaling            | 2.2  | 16% | 1.6 | 17% |
| 1421236_at   | Ripk2     | TNFRSF-interacting serine-threonine kinase 2 | NM_138952    | signaling            | 2.2  | 10% | 3.2 | 14% |
| 1418571_at   | Tnfrsf12a | TNF receptor superfamily                     | NM_013749    | cytokine or receptor | 39.3 | 50% | 1.9 | 29% |
| 1418572_x_at | Tnfrsf12a | TNF receptor superfamily                     | NM_013749    | cytokine or receptor | 18.7 | 59% | 2.1 | 31% |
| 1421207_at   | Lif       | cytokine                                     | NM_001039537 | cytokine or receptor | 8.4  | 37% | 2.4 | 54% |
| 1419132_at   | Tlr2      | toll-like receptor 2                         | NM_011905    | cytokine or receptor | 5.2  | 13% | 5.0 | 14% |
| 1438658_a_at | Edg3      | S1P receptor                                 | NM_010101    | cytokine or receptor | 4.7  | 5%  | 2.5 | 10% |
| 1437173_at   | Edg3      | S1P receptor                                 | NM_010101    | cytokine or receptor | 4.5  | 9%  | 2.4 | 12% |
| 1452483_a_at | Cd44      | CD44 antigen                                 | NM_001039150 | cytokine or receptor | 3.5  | 12% | 1.1 | 14% |
| 1460251_at   | Fas       | TNF receptor superfamily                     | NM_007987    | cytokine or receptor | 3.5  | 27% | 2.3 | 22% |
| 1460220_a_at | Csf1      | cytokine                                     | NM_007778    | cytokine or receptor | 3.3  | 9%  | 2.4 | 12% |
| 1460661_at   | Edg3      | S1P receptor                                 | NM_010101    | cytokine or receptor | 3.2  | 22% | 3.0 | 21% |
| 1418674_at   | Osmr      | oncostatin M receptor                        | NM_011019    | cytokine or receptor | 2.6  | 9%  | 1.0 | 10% |
| 1425107_a_at | Lifr      | LIF receptor                                 | NM_013584    | cytokine or receptor | 2.1  | 22% | 1.2 | 21% |
| 1449363_at   | Atf3      | transcription factor                         | NM_007498    | gene regulation      | 22.4 | 37% | 3.8 | 19% |
| 1423233_at   | Cebpd     | transcription factor                         | NM_007679    | gene regulation      | 12.7 | 9%  | 4.1 | 14% |
| 1427682_a_at | Egr2      | transcription factor                         | NM_010118    | gene regulation      | 8.8  | 14% | 8.1 | 13% |

|              |          |                                                           |              |                 |      |     |      |     |
|--------------|----------|-----------------------------------------------------------|--------------|-----------------|------|-----|------|-----|
| 1427683_at   | Egr2     | transcription factor                                      | NM_010118    | gene regulation | 8.1  | 10% | 6.5  | 9%  |
| 1456605_at   | Cebpd    | transcription factor                                      | NM_007679    | gene regulation | 4.9  | 12% | 3.2  | 21% |
| 1416564_at   | Sox7     | transcription factor                                      | NM_011446    | gene regulation | 3.4  | 21% | 1.8  | 17% |
| 1451755_a_at | Apobec1  | RNA editing enzyme                                        | NM_031159    | gene regulation | 3.2  | 7%  | 1.8  | 12% |
| 1427844_a_at | Cebpb    | transcription factor                                      | NM_009883    | gene regulation | 3.1  | 27% | 2.5  | 12% |
| 1423100_at   | Fos      | transcription factor                                      | NM_010234    | gene regulation | 2.9  | 7%  | 1.5  | 7%  |
| 1418901_at   | Cebpb    | transcription factor                                      | NM_009883    | gene regulation | 2.6  | 6%  | 1.9  | 6%  |
| 1432979_at   | Gatad2b  | transcription factor                                      | NM_139304    | gene regulation | 2.1  | 21% | 0.9  | 29% |
| 1448734_at   | Cp       | ceruloplasmin                                             | NM_001042611 | enzyme          | 10.1 | 14% | 2.5  | 22% |
| 1449152_at   | Cdkn2b   | cyclin-dependent kinase inhibitor 2B (p15, inhibits CDK4) | NM_007670    | enzyme          | 6.9  | 47% | 1.9  | 31% |
| 1460227_at   | Timp1    | tissue inhibitor of metalloproteinase 1                   | NM_001044384 | enzyme          | 3.6  | 14% | 1.5  | 22% |
| 1417494_a_at | Cp       | ceruloplasmin                                             | NM_001042611 | enzyme          | 3.0  | 7%  | 2.4  | 21% |
| 1451537_at   | Chi3l1   | chitinase 3-like 1                                        | NM_007695    | enzyme          | 3.0  | 22% | 2.2  | 19% |
| 1455393_at   | Cp       | ceruloplasmin                                             | NM_001042611 | enzyme          | 2.9  | 29% | 2.1  | 31% |
| 1450716_at   | Adamts1  | a disintegrin-like and metalloproteinase                  | NM_009621    | enzyme          | 2.8  | 6%  | 1.8  | 6%  |
| 1418678_at   | Has2     | hyaluronan synthase 2                                     | NM_008216    | enzyme          | 2.6  | 14% | 2.3  | 16% |
| 1417496_at   | Cp       | ceruloplasmin                                             | NM_001042611 | enzyme          | 2.4  | 26% | 1.4  | 29% |
| 1417495_x_at | Cp       | ceruloplasmin                                             | NM_001042611 | enzyme          | 2.3  | 22% | 1.6  | 16% |
| 1460197_a_at | Steap4   | STEAP family member 4                                     | NM_054098    | other           | 81.2 | 10% | 84.4 | 10% |
| 1438855_x_at | Tnfrsf25 | tumor necrosis factor, alpha-induced protein 2            | NM_009396    | other           | 56.6 | 9%  | 32.5 | 16% |
| 1426784_at   | Trim47   | tripartite motif protein 47                               | NM_172570    | other           | 25.3 | 26% | 2.4  | 24% |
| 1427747_a_at | Lcn2     | lipocalin 2                                               | NM_008491    | other           | 18.1 | 31% | 7.7  | 14% |

|              |       |                                          |              |       |      |     |      |     |
|--------------|-------|------------------------------------------|--------------|-------|------|-----|------|-----|
| 1424067_at   | Icam1 | intercellular adhesion molecule          | NM_010493    | other | 15.2 | 24% | 3.8  | 14% |
| 1418666_at   | Ptx3  | pentraxin related gene                   | NM_008987    | other | 11.7 | 9%  | 11.9 | 13% |
| 1421321_a_at | Net1  | neuroepithelial cell transforming gene 1 | NM_001047159 | other | 2.9  | 7%  | 1.4  | 12% |

The ProbeSet\_ID is the unique Affymetrix identifier for the sequences on the array, where there can be more than one probe set per gene. The AcP fold change (FC) and AcP+AcPb FC values are the fold change as a result of IL-1 stimulation, evaluated from ratios built between triplicate samples. The error % is the mean log error in the ratio, where the error model allows only a maximum 100-fold change.

**SupplementaryTable II.** AcPb-dependent responses are also induced in AcP cultures

| ProbeSet_ID  | GeneName      | Accession#   | AcP FC | AcP p-val | AcP+AcPb FC | AcP+AcPb p-val | AcPb FC | AcPb p-val |
|--------------|---------------|--------------|--------|-----------|-------------|----------------|---------|------------|
| 1435508_x_at | 0610009D07Rik | NM_025323    | 1.25   | 4.3E-01   | 2.02        | 4.6E-06        | 1.99    | 2.7E-11    |
| 1437452_x_at | Vdac1         | NM_011694    | 1.5    | 5.0E-02   | 1.86        | 5.0E-05        | 1.9     | 2.6E-04    |
| 1420042_at   | Thoc1         | NM_153552    | 1.3    | 6.0E-02   | 1.97        | 1.3E-04        | 1.88    | 7.3E-06    |
| 1441788_s_at | BC068171      | NM_001030307 | 1.16   | 1.1E-01   | 1.26        | 3.9E-04        | 1.42    | 6.5E-14    |
| 1453245_at   | 9130024F11Rik | XM_978942    | 1.2    | 1.0E-01   | 1.29        | 2.4E-04        | 1.38    | 4.7E-04    |
| 1433733_a_at | Cry1          | NM_007771    | 1.26   | 6.0E-02   | 1.47        | 1.1E-04        | 1.36    | 4.0E-07    |
| 1428224_at   | Hnrpdl        | NM_016690    | 1.12   | 2.7E-01   | 1.27        | 1.5E-04        | 1.34    | 8.3E-07    |
| 1433453_a_at | Abtb2         | NM_178890    | 1.13   | 3.0E-02   | 1.32        | 1.1E-04        | 1.31    | 8.5E-09    |
| 1452063_at   | 2410081M15Rik | NM_028603    | 1.15   | 3.0E-02   | 1.21        | 8.5E-04        | 1.27    | 6.4E-04    |
| 1454793_x_at | Ddx5          | NM_007840    | 1.06   | 4.5E-01   | 1.21        | 9.1E-04        | 1.26    | 2.7E-05    |
| 1438487_s_at | Zzz3          | NM_198416    | 1.15   | 9.0E-02   | 1.18        | 6.0E-04        | 1.25    | 1.1E-04    |
| 1433960_at   | lsg20l2       | NM_177663    | 1.21   | 2.0E-02   | 1.22        | 1.1E-04        | 1.25    | 3.7E-04    |
| 1443524_x_at | Bcl10         | NM_009740    | 1.17   | 1.8E-04   | 1.19        | 8.9E-04        | 1.24    | 1.5E-04    |
| 1451641_at   | Dbr1          | NM_031403    | 1.14   | 1.4E-01   | 1.18        | 6.1E-04        | 1.23    | 1.1E-10    |

|              |               |              |      |         |      |         |      |         |
|--------------|---------------|--------------|------|---------|------|---------|------|---------|
| 1417930_at   | Nab2          | NM_008668    | 1.35 | 8.9E-05 | 1.34 | 7.4E-05 | 1.23 | 3.0E-03 |
| 1433771_at   | 5730446C15Rik | NM_146096    | 1.04 | 6.5E-01 | 1.12 | 1.8E-04 | 1.21 | 2.3E-04 |
| 1420840_at   | Plekha3       | NM_031256    | 1.19 | 1.0E-02 | 1.15 | 1.7E-04 | 1.2  | 2.6E-05 |
| 1425562_s_at | Trnt1         | NM_027296    | 1.11 | 1.0E-01 | 1.19 | 3.1E-04 | 1.2  | 2.3E-04 |
| 1454136_a_at | 4921524J17Rik | NM_025722    | 1.07 | 1.4E-01 | 1.17 | 1.8E-06 | 1.2  | 8.3E-09 |
| 1436566_at   | Rab40b        | NM_139147    | 1.15 | 8.0E-02 | 1.11 | 5.4E-04 | 1.18 | 2.6E-04 |
| 1426964_at   | 3110003A17Rik | XM_125510    | 1.12 | 4.0E-02 | 1.18 | 1.5E-07 | 1.18 | 3.5E-04 |
| 1452534_a_at | Hmgb2         | NM_008252    | 1.13 | 1.2E-01 | 1.32 | 7.4E-06 | 1.18 | 1.2E-04 |
| 1415908_at   | Tspyl1        | NM_009433    | 1.05 | 3.0E-01 | 1.15 | 4.9E-04 | 1.18 | 1.6E-04 |
| 1417625_s_at | Cxcr7         | NM_007722    | 1.23 | 7.5E-04 | 1.28 | 1.7E-05 | 1.17 | 5.2E-07 |
| 1455557_at   | LOC553095     | BB751199     | 1.14 | 5.0E-02 | 1.27 | 1.9E-04 | 1.17 | 9.3E-05 |
| 1436759_x_at | Cnn3          | NM_028044    | 1.24 | 1.7E-09 | 1.29 | 6.5E-04 | 1.16 | 6.3E-07 |
| 1420537_at   | Kctd4         | NM_026214    | 1.05 | 3.1E-01 | 1.18 | 2.4E-04 | 1.16 | 9.1E-05 |
| 1416499_a_at | Dctn6         | NM_011722    | 1.07 | 2.1E-01 | 1.14 | 1.1E-04 | 1.16 | 1.4E-04 |
| 1455643_s_at | Tsr1          | NM_177325    | 1.07 | 1.7E-01 | 1.19 | 8.7E-05 | 1.16 | 5.7E-04 |
| 1438171_x_at | Mettl9        | NM_021554    | 1.09 | 1.0E-01 | 1.22 | 6.2E-04 | 1.14 | 2.5E-04 |
| 1437009_a_at | Zfp364        | NM_026406    | 1.04 | 3.3E-01 | 1.17 | 3.6E-04 | 1.14 | 6.2E-07 |
| 1425460_at   | Mtmr2         | NM_023858    | 1.05 | 2.4E-01 | 1.17 | 8.2E-04 | 1.13 | 1.3E-04 |
| 1419655_at   | Tle3          | NM_009389    | 1.2  | 1.9E-03 | 1.12 | 8.3E-04 | 1.12 | 6.3E-06 |
| 1455959_s_at | 1455959_s_at  | AW825835     | 1.09 | 4.0E-02 | 1.15 | 7.5E-04 | 1.12 | 3.7E-05 |
| 1423130_a_at | Sfrs5         | NM_001079694 | 1.16 | 1.2E-01 | 1.11 | 1.2E-04 | 1.12 | 5.6E-05 |
| 1433883_at   | Tpm4          | NM_001001491 | 1.08 | 1.9E-01 | 1.14 | 1.2E-04 | 1.1  | 1.1E-04 |
| 1448694_at   | Jun           | NM_010591    | 1.27 | 3.3E-04 | 1.29 | 7.1E-05 | 1.08 | 3.5E-01 |
| 1417968_a_at | Mbd1          | NM_013594    | 1.18 | 3.7E-05 | 1.17 | 3.4E-06 | 1.07 | 2.0E-01 |
| 1426994_at   | Phlpp         | XM_129968    | 0.89 | 3.3E-04 | 0.89 | 1.9E-04 | 0.99 | 7.8E-01 |
| 1423740_a_at | Rbm10         | NM_145627    | 0.84 | 9.8E-05 | 0.9  | 1.6E-04 | 0.97 | 5.4E-01 |
| 1452366_at   | 4732435N03Rik | NM_172753    | 0.85 | 6.3E-04 | 0.87 | 2.2E-05 | 0.95 | 7.0E-02 |
| 1436876_at   | Rgs7bp        | NM_029879    | 0.92 | 7.0E-02 | 0.87 | 2.1E-05 | 0.9  | 8.6E-04 |
| 1419286_s_at | Ift81         | NM_009879    | 0.89 | 5.0E-02 | 0.89 | 8.2E-04 | 0.89 | 3.7E-05 |
| 1417115_at   | Map3k12       | NM_009582    | 0.92 | 1.3E-01 | 0.89 | 1.6E-04 | 0.89 | 9.1E-04 |
| 1457412_at   | Scn8a         | NM_001077499 | 0.87 | 4.1E-04 | 0.85 | 4.1E-04 | 0.89 | 2.5E-03 |
| 1449465_at   | Reln          | NM_011261    | 0.88 | 1.6E-03 | 0.8  | 6.7E-05 | 0.88 | 6.6E-04 |

|              |               |           |      |         |      |         |      |         |
|--------------|---------------|-----------|------|---------|------|---------|------|---------|
| 1427019_at   | Ptprz1        | XM_620293 | 0.89 | 1.1E-01 | 0.83 | 1.0E-04 | 0.88 | 4.1E-04 |
| 1417403_at   | Elovl6        | NM_130450 | 0.89 | 3.8E-03 | 0.87 | 4.1E-05 | 0.85 | 2.6E-04 |
| 1434530_at   | Odz4          | NM_011858 | 0.82 | 1.5E-03 | 0.79 | 6.6E-04 | 0.84 | 6.9E-06 |
| 1428204_at   | C030002O17Rik | NM_172432 | 0.9  | 1.6E-01 | 0.85 | 6.4E-04 | 0.84 | 3.6E-04 |
| 1429240_at   | Stard4        | NM_133774 | 0.83 | 3.0E-06 | 0.85 | 2.8E-07 | 0.83 | 2.1E-03 |
| 1423626_at   | Dst           | NM_010081 | 0.84 | 1.3E-03 | 0.8  | 5.4E-06 | 0.83 | 7.0E-16 |
| 1433857_at   | Fat1          | XM_885736 | 0.81 | 1.1E-04 | 0.83 | 4.2E-04 | 0.83 | 1.5E-03 |
| 1442095_at   | Asxl3         | XM_140204 | 0.93 | 2.7E-01 | 0.89 | 5.4E-04 | 0.82 | 4.3E-07 |
| 1438207_at   | Gbf1          | NM_178930 | 0.86 | 1.0E-01 | 0.8  | 3.4E-04 | 0.82 | 2.4E-06 |
| 1426491_at   | Herc2         | NM_010418 | 0.86 | 3.0E-02 | 0.8  | 6.8E-04 | 0.8  | 2.4E-06 |
| 1455373_at   | 1455373_at    | BE650990  | 0.72 | 3.0E-02 | 0.78 | 4.3E-04 | 0.8  | 4.3E-04 |
| 1419392_at   | Pclo          | NM_011995 | 0.76 | 3.2E-07 | 0.79 | 8.0E-04 | 0.79 | 5.4E-06 |
| 1439815_at   | A230048G03Rik | XM_283480 | 0.87 | 2.0E-02 | 0.81 | 2.7E-05 | 0.79 | 8.7E-09 |
| 1440970_at   | 1440970_at    | BM218863  | 0.83 | 3.6E-04 | 0.72 | 3.1E-05 | 0.74 | 1.9E-04 |
| 1460574_at   | Fat4          | NM_183221 | 0.82 | 4.2E-04 | 0.72 | 2.4E-04 | 0.74 | 8.7E-06 |
| 1448663_s_at | Mvd           | NM_138656 | 0.86 | 7.8E-03 | 0.86 | 6.5E-05 | 0.73 | 7.4E-05 |
| 1428443_a_at | Rap1gap       | XM_149500 | 0.89 | 1.9E-01 | 0.79 | 5.3E-05 | 0.66 | 2.9E-05 |

Columns are as in Supplementary Table I, with the p-values being the Resolver estimates for the changes occurring by chance, uncorrected for multiple testing. The probe sets were selected for having p-values less than 0.001 in either the AcPb-only or AcP+AcPb ratios.
